# Supplementary material
Source: MDPI journal article supplement (https://www.mdpi.com/2076-3298/11/4/65)
Supplement: s1 [file s1]

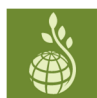

## Supplementary Material

**Table S1.** Water temperature at the time of sampling

| River      | T, °C |
|------------|-------|
| Senga      | 14    |
| Mezha      | 15    |
| Ivnyashka  | 13    |
| Mga        | 13    |
| Koy        | 12    |
| Ilexa      | 13    |
| Kovzha     | 12    |
| Pionerka   | 12    |
| Vuoksa     | 11    |
| Lemb       | 12    |
| Lundozhma  | 10    |
| Ukhta      | 11    |
| Cherpayoki | 10    |
| Olanga     | 10    |

**Table S2.** Coefficients of determination ( $R^2$ ) of the main chemical characteristics (< 0.22  $\mu\text{m}$  filtrates) and physiographic characteristics of the research objects.

| $R^2$                         | pH    | $\text{æ}$       | $\text{HCO}_3^-$ | $\text{Cl}^-$ | $\text{NO}_3^-$ | $\text{SO}_4^{2-}$ | Na    | Mg    | K     | Ca    | DOC  | Fe    |
|-------------------------------|-------|------------------|------------------|---------------|-----------------|--------------------|-------|-------|-------|-------|------|-------|
|                               |       | $\mu\text{S/cm}$ | mg/L             |               |                 |                    |       |       |       |       |      |       |
| Latitude                      | 0.10  | 0.08             | 0.14             | 0.001         | 0.35            | 0.06               | 0.04  | 0.06  | 0.15  | 0.18  | 0.20 | 0.06  |
| Catchment area, $\text{km}^2$ | 0.03  | 0.04             | 0.002            | 0.11          | 0.00            | 0.13               | 0.001 | 0.04  | 0.04  | 0.005 | 0.01 | 0.04  |
| Watercourse length, km        | 0.004 | 0.02             | 0.02             | 0.02          | 0.04            | 0.001              | 0.01  | 0.02  | 0.003 | 0.03  | 0.00 | 0.07  |
| MAP, mm/day                   | 0.006 | 0.00             | 0.07             | 0.01          | 0.10            | 0.00               | 0.03  | 0.003 | 0.02  | 0.02  | 0.17 | 0.001 |
| MAAT, °C                      | 0.06  | 0.04             | 0.10             | 0.001         | 0.24            | 0.07               | 0.15  | 0.02  | 0.097 | 0.11  | 0.05 | 0.09  |

**Table S3.** The iron species in the studied waters (%) as calculated by vMINTeq.

| River           | % of iron species                           |                                              |                                                       |                                                       |
|-----------------|---------------------------------------------|----------------------------------------------|-------------------------------------------------------|-------------------------------------------------------|
| Senga           | 0.02 Fe(OH) <sub>2</sub> <sup>+</sup>       | 99.975/FA <sub>2</sub> FeOH <sub>(aq)</sub>  |                                                       |                                                       |
| Mezha           | 0.149 Fe(OH) <sub>2</sub> <sup>+</sup>      | 99.84/ FA <sub>2</sub> FeOH <sub>(aq)</sub>  |                                                       |                                                       |
| Ivnyashka       | 99.985/FA <sub>2</sub> FeOH <sub>(aq)</sub> |                                              |                                                       |                                                       |
| Mga             | 0.992 Fe(OH) <sub>2</sub> <sup>+</sup>      | 0.032 Fe(OH) <sub>3 (aq)</sub>               | 0.044 Fe(OH) <sub>4</sub> <sup>-</sup>                | 98,929/FA <sub>2</sub> FeOH <sub>(aq)</sub>           |
| Koy             | 99.994/FA <sub>2</sub> FeOH <sub>(aq)</sub> |                                              |                                                       |                                                       |
| Ilexa           | 1.889 Fe(OH) <sub>2</sub> <sup>+</sup>      | 0.098 Fe(OH) <sub>3 (aq)</sub>               | 0.212 Fe(OH) <sub>4</sub> <sup>-</sup>                | 97,8/FA <sub>2</sub> FeOH <sub>(aq)</sub>             |
| Kovzha          | 0.084 Fe(OH) <sub>2</sub> <sup>+</sup>      | 99.903/FA <sub>2</sub> FeOH <sub>(aq)</sub>  |                                                       |                                                       |
| Pionerka        | 99.989/FA <sub>2</sub> FeOH <sub>(aq)</sub> |                                              |                                                       |                                                       |
| Vuoksa          | 99.992/FA <sub>2</sub> FeOH <sub>(aq)</sub> |                                              |                                                       |                                                       |
| Lemb            | 0.159 Fe(OH) <sub>2</sub> <sup>+</sup>      | 99.826/FA <sub>2</sub> FeOH <sub>(aq)</sub>  |                                                       |                                                       |
| Lun-<br>dozhma  | 0.115 Fe(OH) <sub>2</sub> <sup>+</sup>      | 99.869/FA <sub>2</sub> FeOH <sub>(aq)</sub>  | 0.016/FA <sub>2</sub> Fe <sup>+</sup> <sub>(aq)</sub> |                                                       |
| Ukhta           | 0.199 Fe(OH) <sub>2</sub> <sup>+</sup>      | 99.784/ FA <sub>2</sub> FeOH <sub>(aq)</sub> |                                                       |                                                       |
| Cherpay-<br>oki | 2.396 Fe(OH) <sub>2</sub> <sup>+</sup>      | 0.01 Fe(OH) <sub>3 (aq)</sub>                | 97.561/FA <sub>2</sub> FeOH <sub>(aq)</sub>           | 0,029/FA <sub>2</sub> Fe <sup>+</sup> <sub>(aq)</sub> |
| Olanga          | 0.011 Fe(OH) <sub>2</sub> <sup>+</sup>      | 99.982/FA <sub>2</sub> FeOH <sub>(aq)</sub>  |                                                       |                                                       |

Footnote: FA is for Fulvic Acid

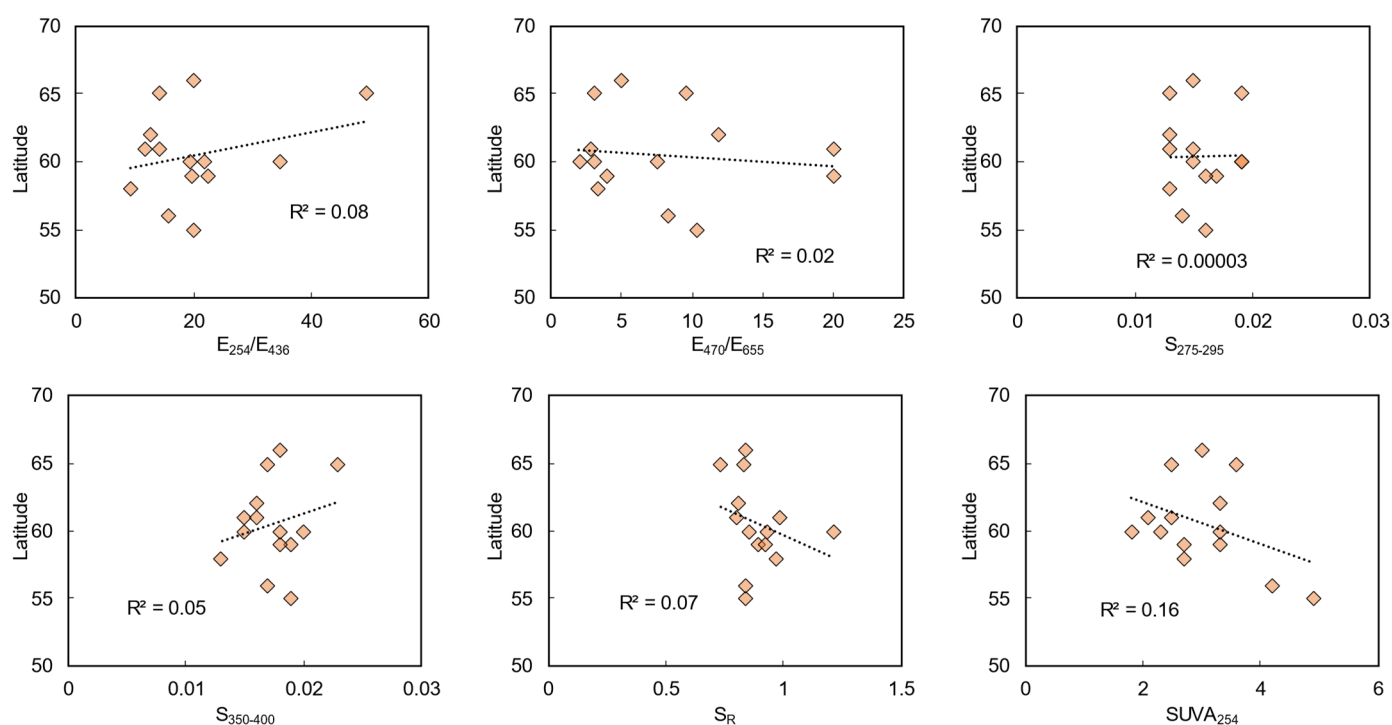

**Figure S1.** No correlations of main optical characteristics with latitude of sample points.

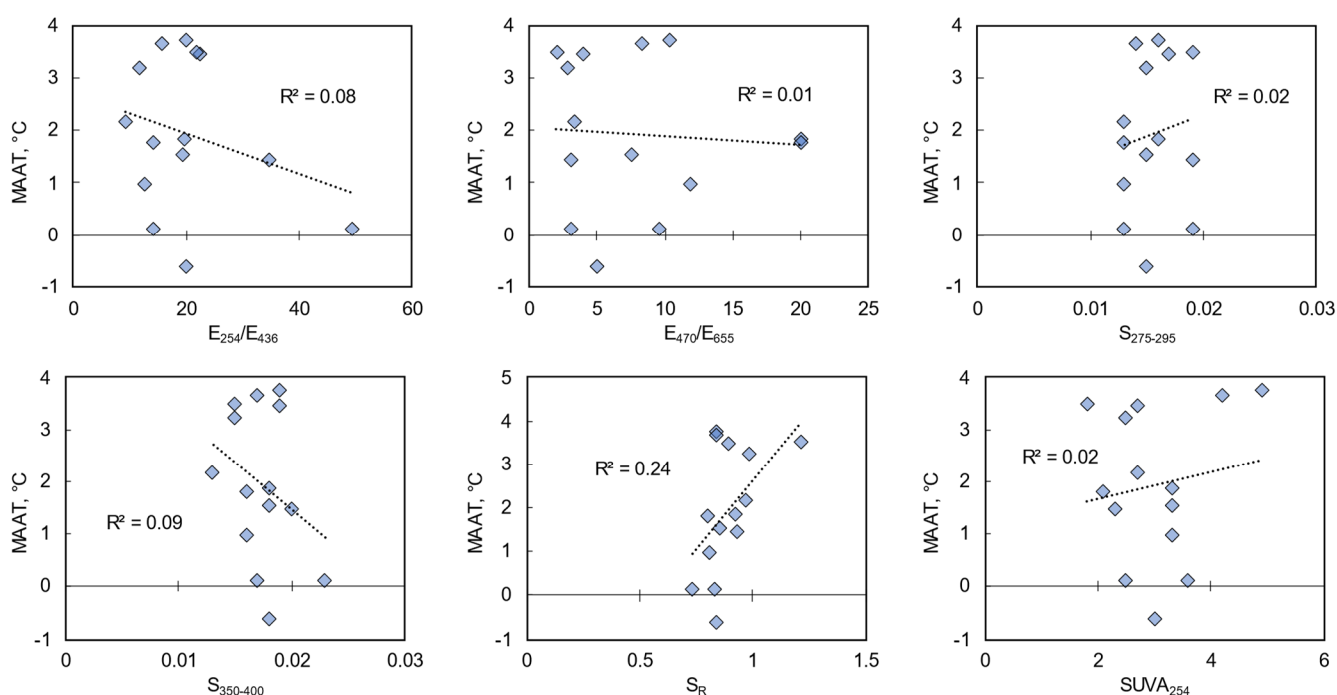

**Figure S2.** Lack of correlations between main optical characteristics with mean annual air temperature (MAAT, °C) of sample points.

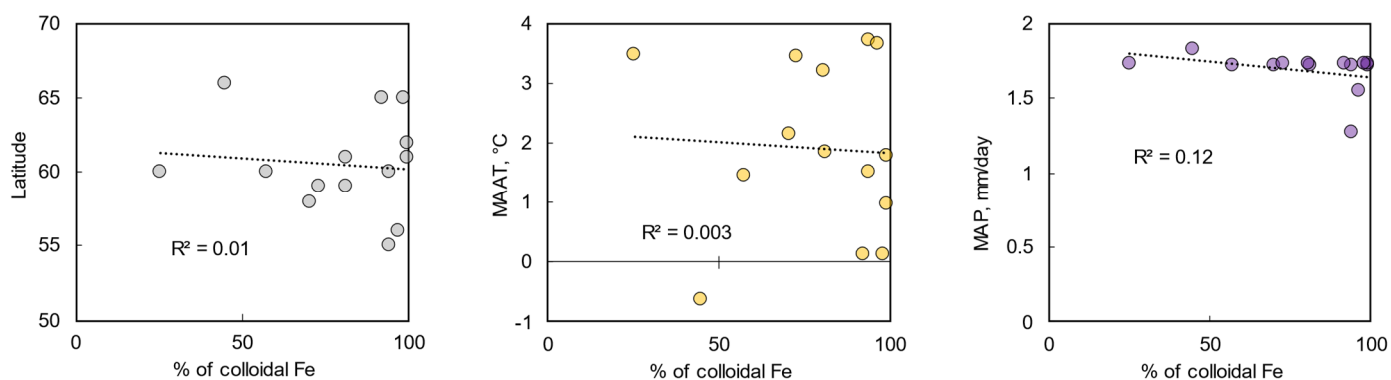

**Figure S3.** Lack of correlations between the percentage of colloidal Fe and latitude, mean annual air temperature (MAAT, °C) and mean annual precipitation (MAP, mm/day) of samples river watersheds.

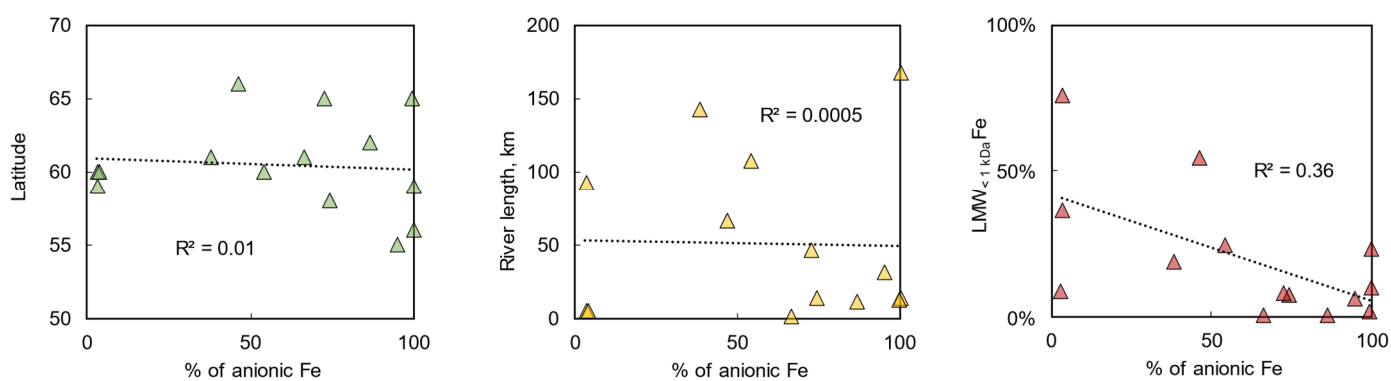

**Figure S4.** Lack of correlations between the percentage of anionic Fe and latitude, river length (km) and % of LMW<sub><1 kDa</sub> Fe.

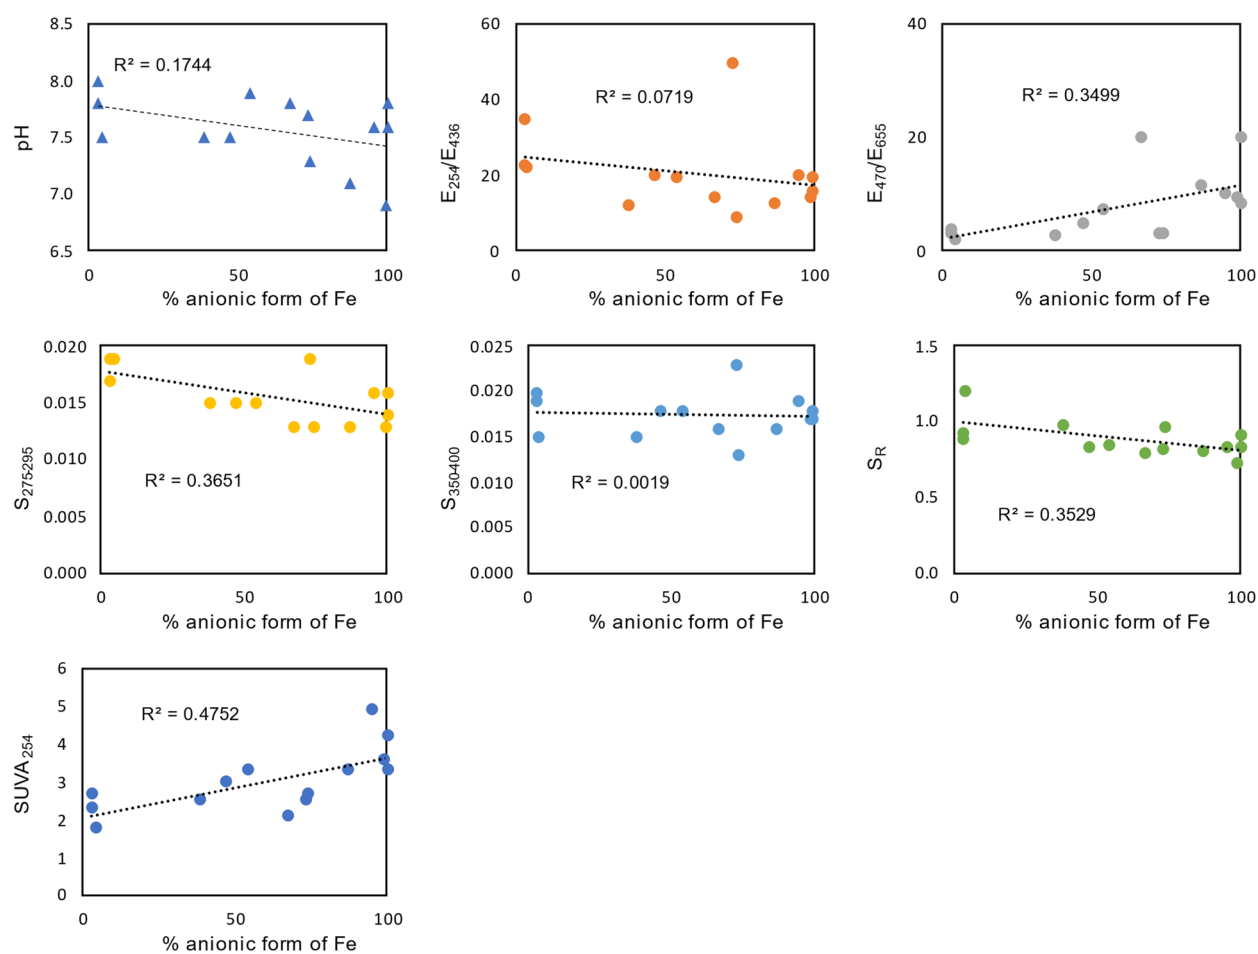

**Figure S5.** Lack of correlations between the percentage of anionic Fe vs pH and most optical characteristics.
